# Supplementary material for: High-pressure behaviour of a CaIrO3 perovskite-type structure
Source: Copernicus journal article supplement (doi:10.5194/ejm-37-699-2025), 2025-10-10
Supplement: Supplementary file [file ejm-37-699-2025-supplement-title-page.pdf › ejm-37-699-2025-supplement-title-page.pdf]

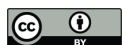

## *Supplement of*

# **High-pressure behaviour of a $\text{CaIrO}_3$ perovskite-type structure**

**Tiziana Boffa Ballaran et al.**

*Correspondence to:* Tiziana Boffa Ballaran ([tiziana.boffa-ballaran@uni-bayreuth.de](mailto:tiziana.boffa-ballaran@uni-bayreuth.de))

- [ejm-37-699-2025-supplement-title-page.pdf](#)
- [ba8x2.cif](#)
- [pressure.cif](#)

The copyright of individual parts of the Supplement might differ from the article licence.
